# Supplementary material for: Predicting no-show appointments in a pediatric hospital in Chile using machine learning
Source: PubMed Central journal article supplement (PMC10257628; doi:10.1007/s10729-022-09626-z), 2023-01-28
Supplement: 10729_2022_9626_MOESM1_ESM.pdf [file 10729_2022_9626_MOESM1_ESM.pdf]

## Supplementary Material

This section contains the ten (10) most Gini important features for each model that was selected for each specialty.

Table 1: Features of RandomForestClassifier: Cardiology

| Feature                          | Value |
|----------------------------------|-------|
| Historical no-show = General     | 0.08  |
| Reservation delay = 0 weeks      | 0.07  |
| Insurance = A group              | 0.03  |
| Day of the week = Monday         | 0.02  |
| Commune of residence = Peñalolen | 0.02  |
| Commune of residence = Macul     | 0.02  |
| Age = Second infancy             | 0.02  |
| Sex = Female                     | 0.02  |
| Sex = Male                       | 0.02  |
| Insurance = B group              | 0.02  |

Table 4: Features of BalancedBaggingClassifier: Gastroenterology

| Feature                                | Value |
|----------------------------------------|-------|
| Age = Teenager                         | 0.01  |
| Commune of residence = Maria elena     | 0.01  |
| Reservation delay = 8 weeks            | 0.01  |
| Commune of residence = La higuera      | 0.01  |
| Month = May                            | 0.01  |
| Reservation delay = 1 week             | 0.01  |
| Commune of residence = Rio negro       | 0.01  |
| Commune of residence = Sagrada familia | 0.01  |
| Commune of residence = Cerro navia     | 0.01  |
| Sex = Male                             | 0.01  |

Table 2: Features of RandomForestClassifier: Dermatology

| Feature                          | Value |
|----------------------------------|-------|
| Reservation delay = 0 weeks      | 0.11  |
| Historical no-show = General     | 0.08  |
| Type of appointment = Routine    | 0.03  |
| Insurance = A group              | 0.02  |
| Age = Second infancy             | 0.02  |
| Sex = Female                     | 0.02  |
| Sex = Male                       | 0.02  |
| Commune of residence = Peñalolen | 0.02  |
| Reservation delay = 8 weeks      | 0.02  |
| Day of the week = Wednesday      | 0.02  |

Table 5: Features of LogisticRegression: General Surgery

| Feature                                | Value |
|----------------------------------------|-------|
| Commune of residence = Llaillay        | 6.79  |
| Commune of residence = Yervas buenas   | 5.27  |
| Commune of residence = Castro          | 5.05  |
| Commune of residence = Vallenar        | 4.69  |
| Commune of residence = Puren           | 4.56  |
| Commune of residence = Lolol           | 4.22  |
| Commune of residence = Cerro navia     | 4.22  |
| Commune of residence = Caldera         | 4.06  |
| Commune of residence = Coelemu         | 3.90  |
| Commune of residence = Calera de tango | 3.52  |

Table 3: Features of RandomForestClassifier: Endocrinology

| Feature                               | Value |
|---------------------------------------|-------|
| Reservation delay = 0 weeks           | 0.11  |
| Historical no-show = General          | 0.07  |
| Insurance = A group                   | 0.03  |
| Commune of residence = Peñalolen      | 0.02  |
| Hour = 8                              | 0.02  |
| Type of appointment = Routine         | 0.02  |
| Age = Second infancy                  | 0.02  |
| Insurance = B group                   | 0.02  |
| Type of appointment = 1st appointment | 0.02  |
| Day of the week = Tuesday             | 0.02  |

Table 6: Features of BalancedRandomForestClassifier: Genetics

| Feature                          | Value |
|----------------------------------|-------|
| Historical no-show = General     | 0.08  |
| Commune of residence = Peñalolen | 0.02  |
| Insurance = A group              | 0.02  |
| Hour = 9                         | 0.02  |
| Age = First infancy              | 0.02  |
| Sex = Male                       | 0.02  |
| Age = Second infancy             | 0.02  |
| Type of appointment = Routine    | 0.02  |
| Hour = 10                        | 0.02  |
| Sex = Female                     | 0.02  |

Table 7: Features of BalancedBaggingClassifier: Gynecology

| Feature                                 | Value |
|-----------------------------------------|-------|
| Commune of residence = Coltauco         | 0.009 |
| Commune of residence = Cartagena        | 0.008 |
| Commune of residence = Colina           | 0.007 |
| Commune of residence = San fernando     | 0.007 |
| Commune of residence = Castro           | 0.007 |
| Commune of residence = Cerrillos        | 0.007 |
| Commune of residence = Rauco            | 0.007 |
| Commune of residence = Estacion central | 0.006 |
| Commune of residence = Lanco            | 0.006 |
| Commune of residence = Valparaiso       | 0.006 |

Table 8: Features of RandomForestClassifier: Hematology

| Feature                               | Value |
|---------------------------------------|-------|
| Reservation delay = 0 weeks           | 0.09  |
| Type of appointment = 1st appointment | 0.06  |
| Type of appointment = Routine         | 0.06  |
| Historical no-show = General          | 0.06  |
| Commune of residence = Peñalolen      | 0.05  |
| Hour = 10                             | 0.05  |
| Day of the week = Friday              | 0.03  |
| Reservation delay = 1 week            | 0.02  |
| Hour = 9                              | 0.02  |
| Insurance = A group                   | 0.02  |

Table 9: Features of RandomForestClassifier: Infectology

| Feature                          | Value |
|----------------------------------|-------|
| Reservation delay = 0 weeks      | 0.12  |
| Historical no-show = General     | 0.06  |
| Insurance = A group              | 0.05  |
| Commune of residence = Peñalolen | 0.04  |
| Reservation delay = 1 week       | 0.04  |
| Type of appointment = Routine    | 0.03  |
| Insurance = D group              | 0.03  |
| Day of the week = Tuesday        | 0.03  |
| Month = September                | 0.03  |
| Commune of residence = Ñuñoa     | 0.02  |

Table 10: Features of BalancedBaggingClassifier: Nephrology

| Feature                          | Value |
|----------------------------------|-------|
| Historical no-show = General     | 0.12  |
| Reservation delay = 0 weeks      | 0.04  |
| Commune of residence = Peñalolen | 0.02  |
| Insurance = A group              | 0.02  |
| Hour = 10                        | 0.02  |
| Month = June                     | 0.02  |
| Hour = 11                        | 0.02  |
| Day of the week = Tuesday        | 0.02  |
| Day of the week = Thursday       | 0.02  |
| Commune of residence = Ñuñoa     | 0.01  |

Table 11: Features of BalancedBaggingClassifier: Neurology

| Feature                          | Value |
|----------------------------------|-------|
| Historical no-show = General     | 0.13  |
| Commune of residence = Peñalolen | 0.02  |
| Day of the week = Tuesday        | 0.02  |
| Day of the week = Thursday       | 0.02  |
| Age = Second infancy             | 0.02  |
| Commune of residence = Macul     | 0.02  |
| Insurance = A group              | 0.02  |
| Age = First infancy              | 0.02  |
| Hour = 10                        | 0.02  |
| Day of the week = Friday         | 0.02  |

Table 12: Features of LogisticRegression: Nutrition

| Feature                                   | Value |
|-------------------------------------------|-------|
| Commune of residence = Lo espejo          | 0.53  |
| Commune of residence = Macul              | 0.44  |
| Reservation delay = 8 weeks               | 0.33  |
| Reservation delay = 5 weeks               | 0.29  |
| Type of appointment = 1st appointment phc | 0.28  |
| Commune of residence = Puente alto        | 0.28  |
| Commune of residence = Providencia        | 0.27  |
| Month = November                          | 0.26  |
| Reservation delay = 7 weeks               | 0.25  |
| Commune of residence = San javier         | 0.22  |

Table 13: Features of RandomForestClassifier: Oncology

| Feature                      | Value |
|------------------------------|-------|
| Historical no-show = General | 0.08  |
| Reservation delay = 0 weeks  | 0.05  |
| Hour = 10                    | 0.02  |
| Insurance = A group          | 0.02  |
| Hour = 11                    | 0.02  |
| Reservation delay = 1 week   | 0.02  |
| Day of the week = Thursday   | 0.02  |
| Sex = Male                   | 0.02  |
| Day of the week = Tuesday    | 0.02  |
| Age = Second infancy         | 0.02  |

Table 14: Features of BalancedRandomForestClassifier: Ophthalmology

| Feature                          | Value |
|----------------------------------|-------|
| Historical no-show = General     | 0.10  |
| Insurance = A group              | 0.02  |
| Commune of residence = Peñalolen | 0.02  |
| Reservation delay = 0 weeks      | 0.02  |
| Age = Second infancy             | 0.02  |
| Age = First infancy              | 0.02  |
| Sex = Female                     | 0.02  |
| Sex = Male                       | 0.02  |
| Insurance = B group              | 0.02  |
| Day of the week = Monday         | 0.02  |

Table 15: Features of BalancedBaggingClassifier: Orthodontics

| Feature                               | Value |
|---------------------------------------|-------|
| Commune of residence = La florida     | 0.008 |
| Commune of residence = Bulnes         | 0.008 |
| Commune of residence = Paredones      | 0.007 |
| Commune of residence = Taltal         | 0.007 |
| Reservation delay = 1 week            | 0.007 |
| Commune of residence = Maule          | 0.007 |
| Reservation delay = 2 weeks           | 0.007 |
| Commune of residence = Isla de pascua | 0.007 |
| Commune of residence = San rosendo    | 0.007 |
| Hour = 13                             | 0.006 |

Table 16: Features of BalancedBaggingClassifier: Otorhinolaryngology

| Feature                               | Value |
|---------------------------------------|-------|
| Historical no-show = General          | 0.14  |
| Reservation delay = 0 weeks           | 0.05  |
| Type of appointment = 1st appointment | 0.03  |
| Commune of residence = Peñalolen      | 0.02  |
| Insurance = A group                   | 0.02  |
| Reservation delay = 1 week            | 0.02  |
| Day of the week = Monday              | 0.02  |
| Age = Second infancy                  | 0.02  |
| Age = First infancy                   | 0.02  |
| Day of the week = Thursday            | 0.02  |

Table 17: Features of BalancedBaggingClassifier: Parasitology

| Feature                          | Value |
|----------------------------------|-------|
| Historical no-show = General     | 0.13  |
| Commune of residence = Peñalolen | 0.03  |
| Month = January                  | 0.03  |
| Day of the week = Wednesday      | 0.03  |
| Month = August                   | 0.03  |
| Age = Second infancy             | 0.02  |
| Reservation delay = 0 weeks      | 0.02  |
| Month = April                    | 0.02  |
| Day of the week = Tuesday        | 0.02  |
| Reservation delay = 4 weeks      | 0.02  |

Table 18: Features of BalancedBaggingClassifier: Pediatric Dentistry

| Feature                          | Value |
|----------------------------------|-------|
| Historical no-show = General     | 0.14  |
| Commune of residence = Peñalolen | 0.02  |
| Insurance = A group              | 0.02  |
| Hour = 9                         | 0.02  |
| Hour = 10                        | 0.02  |
| Day of the week = Tuesday        | 0.02  |
| Insurance = B group              | 0.02  |
| Hour = 11                        | 0.02  |
| Month = August                   | 0.02  |
| Day of the week = Thursday       | 0.02  |

Table 19: Features of BalancedRandomForestClassifier: Pediatrics

| Feature                          | Value |
|----------------------------------|-------|
| Historical no-show = General     | 0.09  |
| Reservation delay = 0 weeks      | 0.03  |
| Commune of residence = Peñalolen | 0.02  |
| Insurance = A group              | 0.02  |
| Day of the week = Wednesday      | 0.02  |
| Sex = Female                     | 0.02  |
| Insurance = B group              | 0.02  |
| Sex = Male                       | 0.02  |
| Day of the week = Friday         | 0.02  |
| Hour = 10                        | 0.02  |

Table 20: Features of BalancedRandomForestClassifier: Plastic Surgery

| Feature                          | Value |
|----------------------------------|-------|
| Historical no-show = General     | 0.14  |
| Reservation delay = 0 weeks      | 0.04  |
| Insurance = A group              | 0.02  |
| Age = Teenager                   | 0.02  |
| Commune of residence = Peñalolen | 0.02  |
| Hour = 10                        | 0.02  |
| Reservation delay = 1 week       | 0.02  |
| Age = First infancy              | 0.02  |
| Type of appointment = Routine    | 0.02  |
| Age = Second infancy             | 0.02  |

Table 21: Features of RandomForestClassifier: Psychiatry

| Feature                          | Value |
|----------------------------------|-------|
| Reservation delay = 0 weeks      | 0.09  |
| Historical no-show = General     | 0.08  |
| Type of appointment = Routine    | 0.02  |
| Hour = 11                        | 0.02  |
| Reservation delay = 1 week       | 0.02  |
| Insurance = A group              | 0.02  |
| Reservation delay = 4 weeks      | 0.02  |
| Day of the week = Thursday       | 0.02  |
| Day of the week = Tuesday        | 0.02  |
| Commune of residence = Peñalolen | 0.02  |

Table 22: Features of BalancedRandomForestClassifier: Pulmonology

| Feature                                   | Value |
|-------------------------------------------|-------|
| Reservation delay = 0 weeks               | 0.13  |
| Historical no-show = General              | 0.09  |
| Hour = 15                                 | 0.03  |
| Day of the week = Tuesday                 | 0.02  |
| Commune of residence = Peñalolen          | 0.01  |
| Day of the week = Thursday                | 0.01  |
| Age = Nursling                            | 0.01  |
| Sex = Male                                | 0.01  |
| Hour = 9                                  | 0.01  |
| Type of appointment = 1st appointment phc | 0.01  |

Table 23: Features of BalancedRandomForestClassifier: Rheumatology

| Feature                          | Value |
|----------------------------------|-------|
| Historical no-show = General     | 0.12  |
| Reservation delay = 0 weeks      | 0.03  |
| Day of the week = Wednesday      | 0.02  |
| Commune of residence = Peñalolen | 0.02  |
| Insurance = B group              | 0.02  |
| Commune of residence = Macul     | 0.02  |
| Insurance = A group              | 0.02  |
| Day of the week = Tuesday        | 0.02  |
| Month = May                      | 0.02  |
| Hour = 10                        | 0.02  |

Table 24: Features of BalancedBaggingClassifier: Traumatology

| Feature                              | Value |
|--------------------------------------|-------|
| Type of appointment = Routine        | 0.01  |
| Commune of residence = Santa barbara | 0.01  |
| Commune of residence = Macul         | 0.01  |
| Commune of residence = Zapallar      | 0.01  |
| Reservation delay = 5 weeks          | 0.01  |
| Commune of residence = Putre         | 0.01  |
| Commune of residence = Pirque        | 0.01  |
| Commune of residence = Negrete       | 0.01  |
| Commune of residence = Los angeles   | 0.01  |
| Commune of residence = Lebu          | 0.01  |

Table 25: Features of BalancedRandomForestClassifier: Urology

| Feature                          | Value |
|----------------------------------|-------|
| Historical no-show = General     | 0.11  |
| Commune of residence = Peñalolen | 0.03  |
| Age = Second infancy             | 0.03  |
| Age = First infancy              | 0.03  |
| Insurance = A group              | 0.02  |
| Day of the week = Monday         | 0.02  |
| Day of the week = Thursday       | 0.02  |
| Day of the week = Tuesday        | 0.02  |
| Hour = 12                        | 0.02  |
| Commune of residence = Macul     | 0.02  |

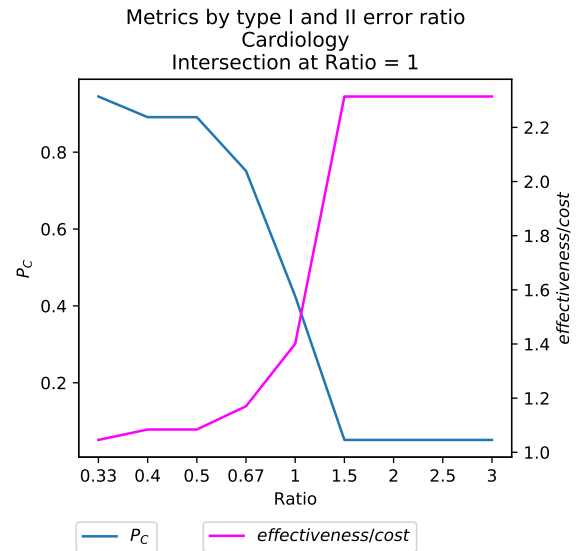

Figure 1: Performance metrics as a function of the type I and II weighting ratio in Cardiology.

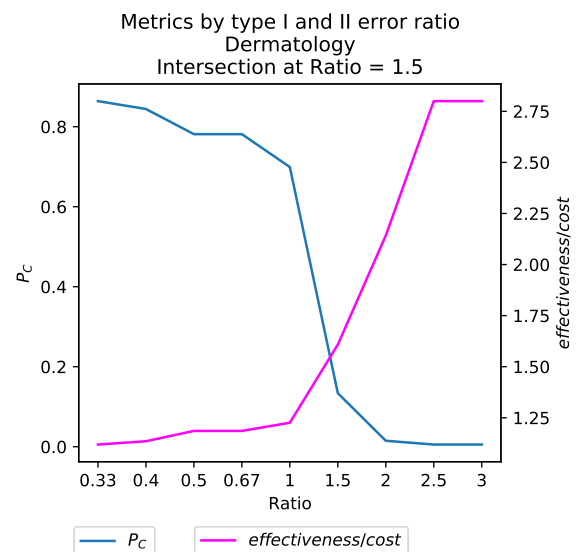

Figure 2: Performance metrics as a function of the type I and II weighting ratio in Dermatology.

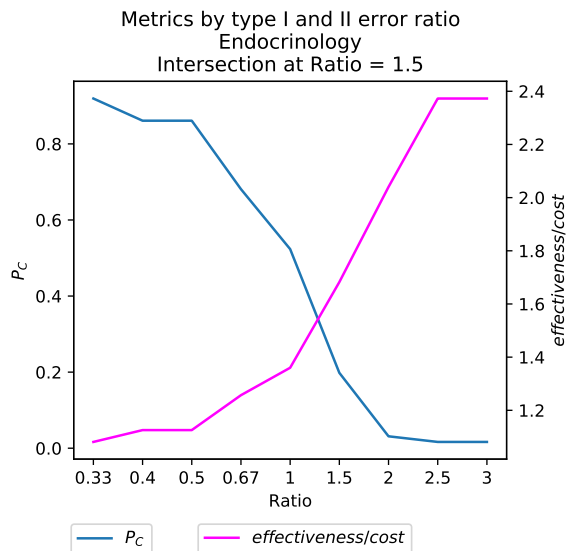

Figure 3: Performance metrics as a function of the type I and II weighting ratio in Endocrinology.

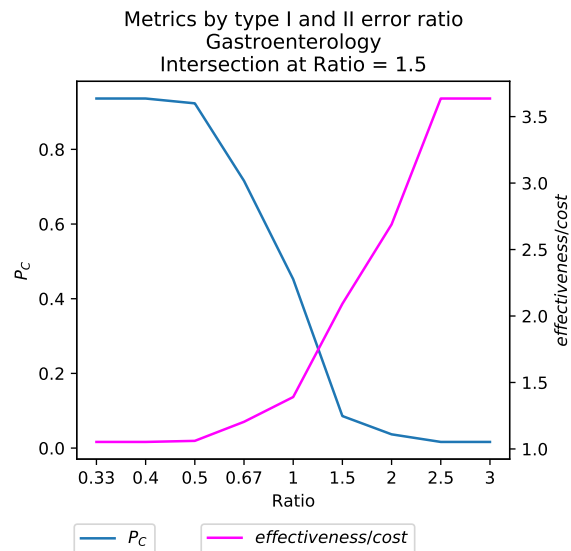

Figure 5: Performance metrics as a function of the type I and II weighting ratio in Gastroenterology.

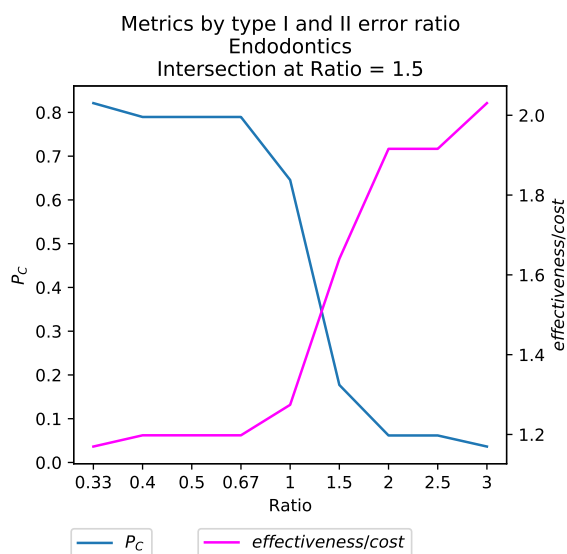

Figure 4: Performance metrics as a function of the type I and II weighting ratio in Endodontics.

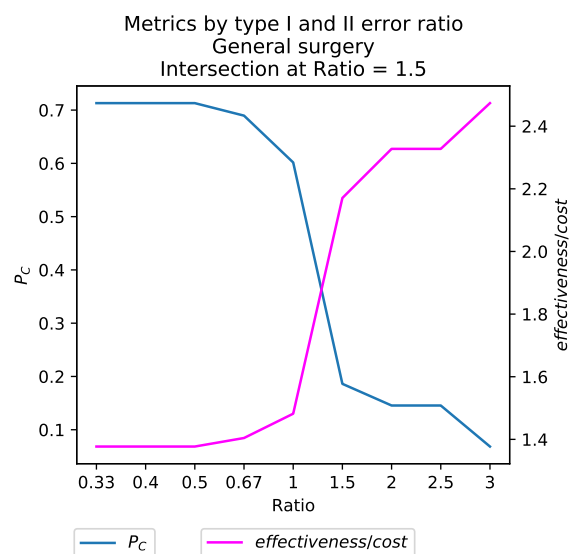

Figure 6: Performance metrics as a function of the type I and II weighting ratio in General surgery.

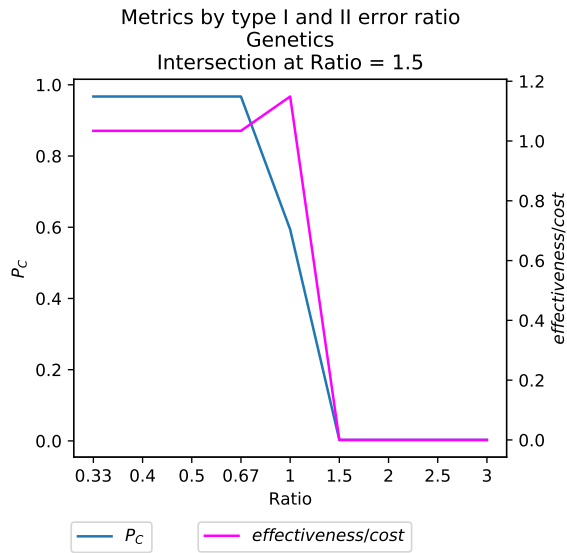

Figure 7: Performance metrics as a function of the type I and II weighting ratio in Genetics.

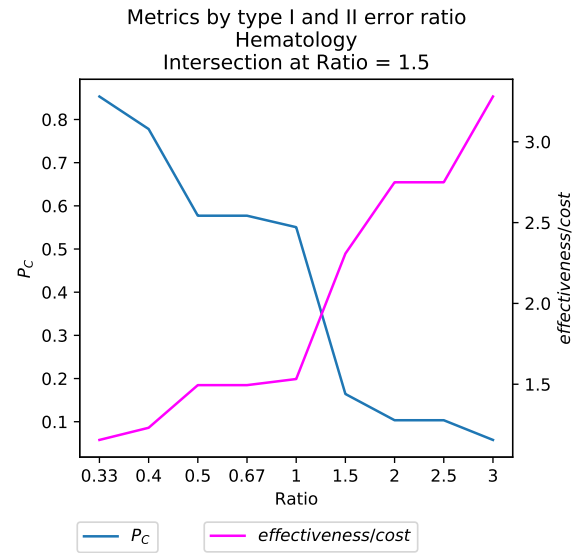

Figure 9: Performance metrics as a function of the type I and II weighting ratio in Hematology.

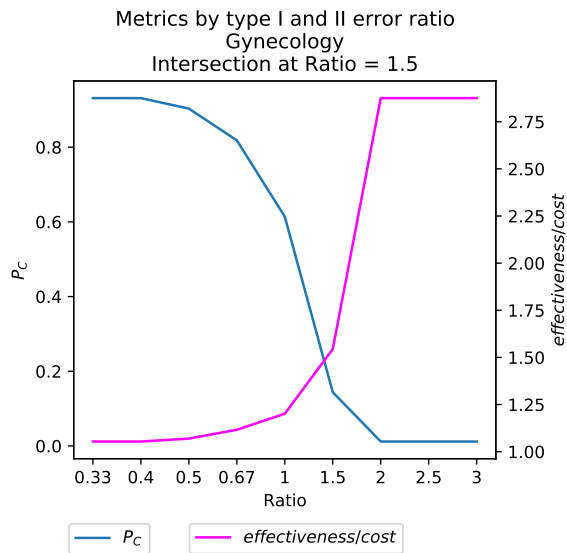

Figure 8: Performance metrics as a function of the type I and II weighting ratio in Gynecology.

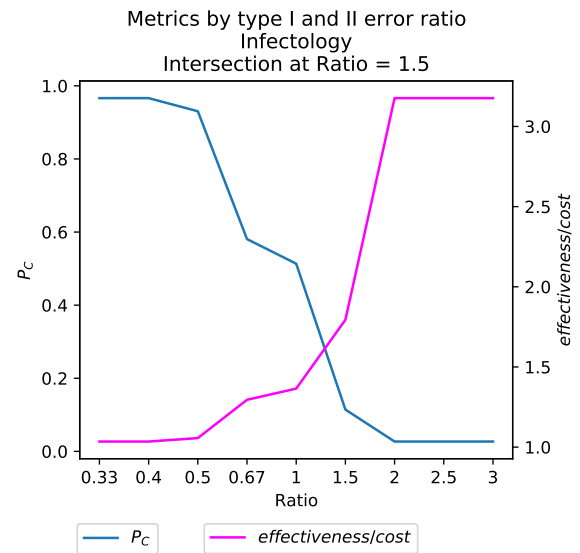

Figure 10: Performance metrics as a function of the type I and II weighting ratio in Infectology.

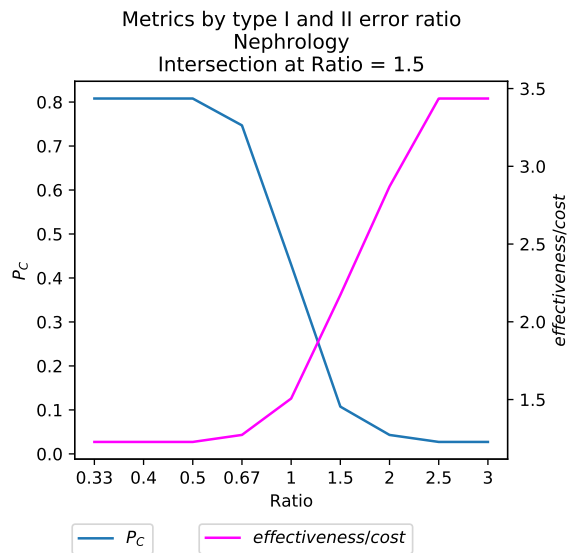

Figure 11: Performance metrics as a function of the type I and II weighting ratio in Nephrology.

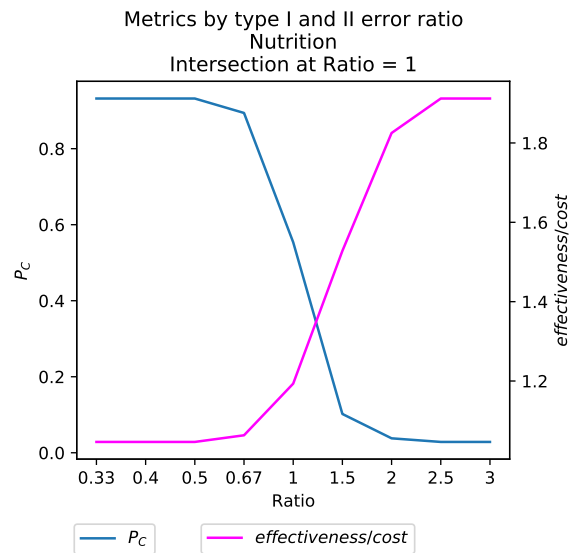

Figure 13: Performance metrics as a function of the type I and II weighting ratio in Nutrition.

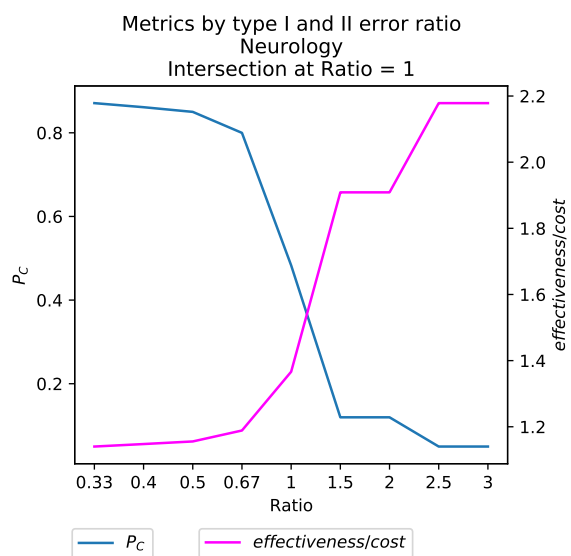

Figure 12: Performance metrics as a function of the type I and II weighting ratio in Neurology.

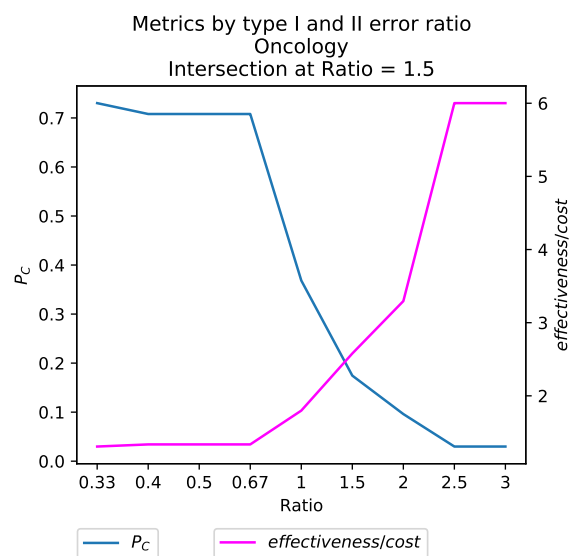

Figure 14: Performance metrics as a function of the type I and II weighting ratio in Oncology.

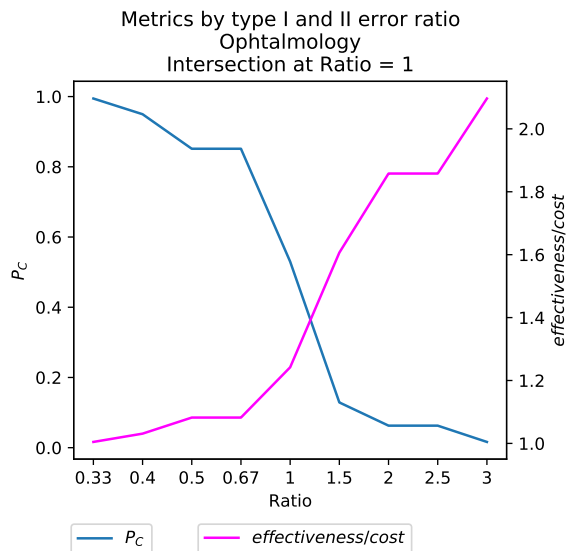

Figure 15: Performance metrics as a function of the type I and II weighting ratio in Ophthalmology.

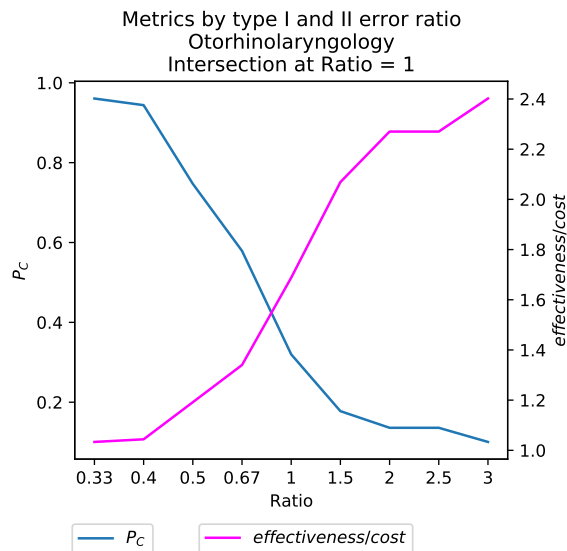

Figure 17: Performance metrics as a function of the type I and II weighting ratio in Otorhinolaryngology.

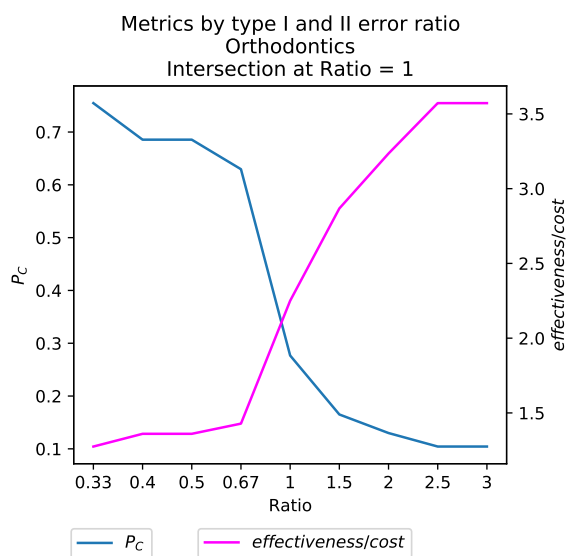

Figure 16: Performance metrics as a function of the type I and II weighting ratio in Orthodontics.

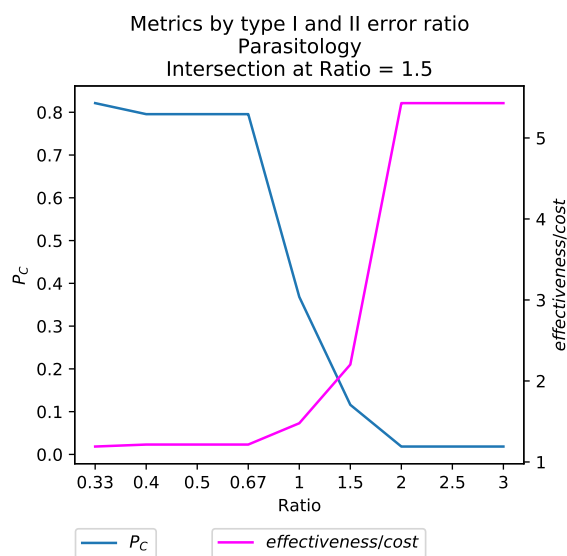

Figure 18: Performance metrics as a function of the type I and II weighting ratio in Parasitology.



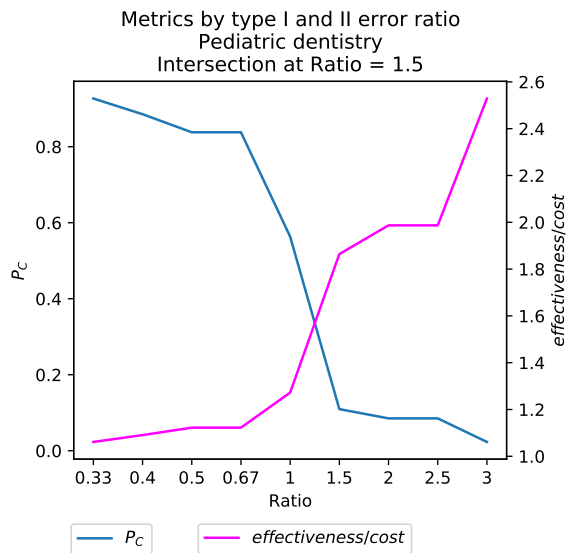

Figure 19: Performance metrics as a function of the type I and II weighting ratio in Pediatric dentistry.

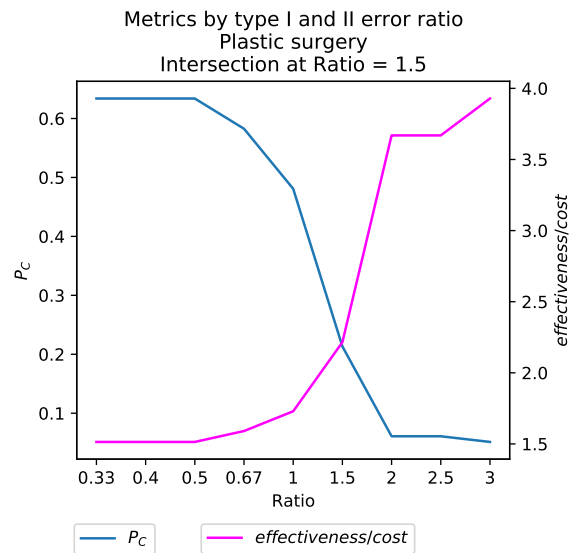

Figure 21: Performance metrics as a function of the type I and II weighting ratio in Plastic surgery.

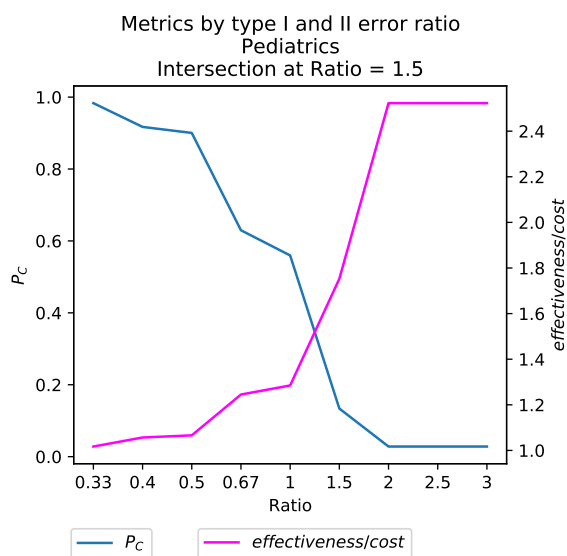

Figure 20: Performance metrics as a function of the type I and II weighting ratio in Pediatrics.

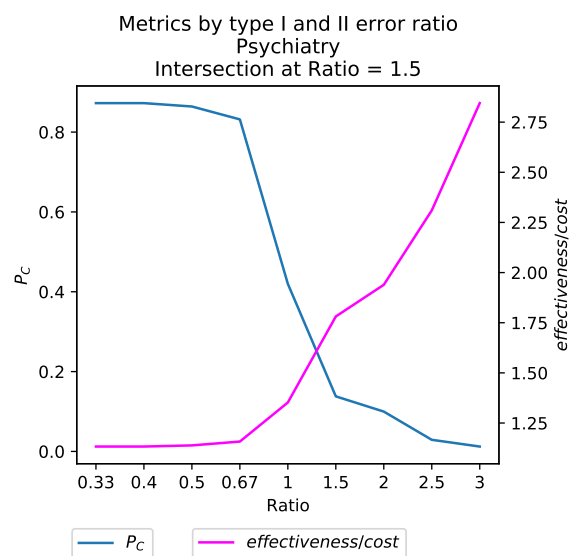

Figure 22: Performance metrics as a function of the type I and II weighting ratio in Psychiatry.

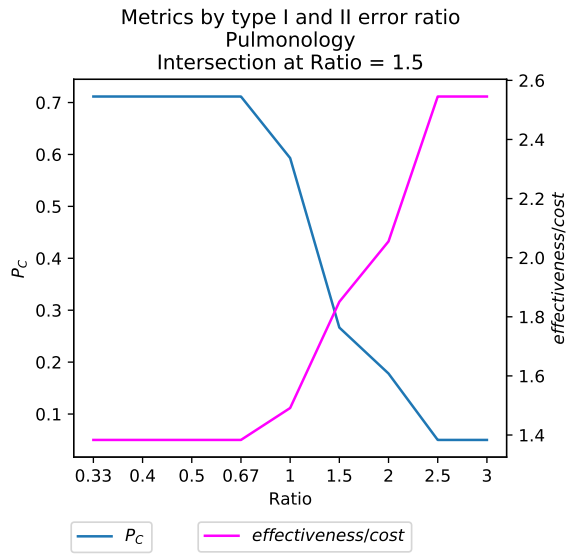

Figure 23: Performance metrics as a function of the type I and II weighting ratio in Pulmonology.

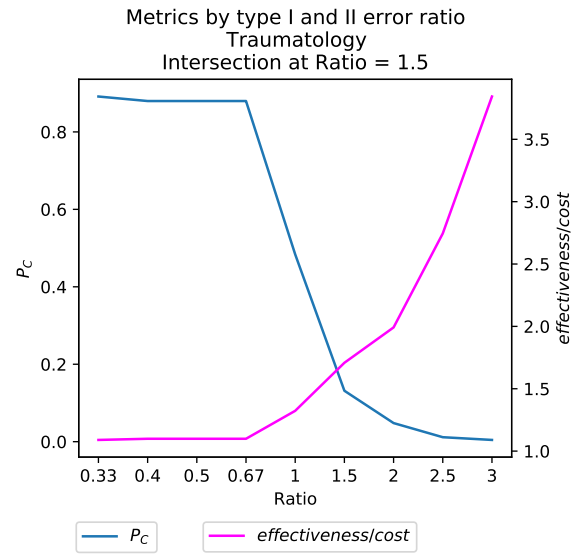

Figure 25: Performance metrics as a function of the type I and II weighting ratio in Traumatology.

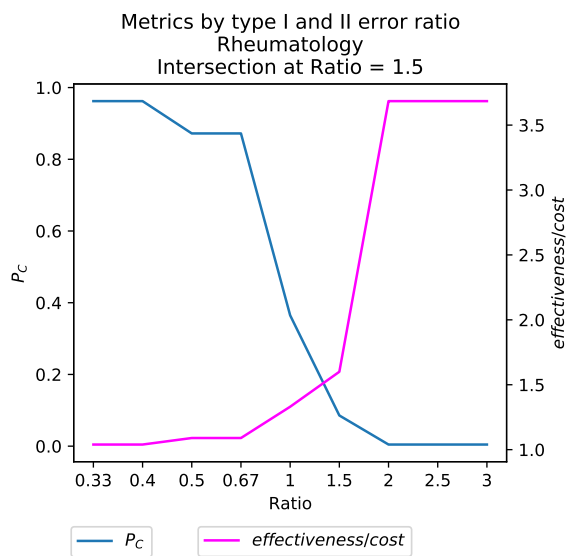

Figure 24: Performance metrics as a function of the type I and II weighting ratio in Rheumatology.

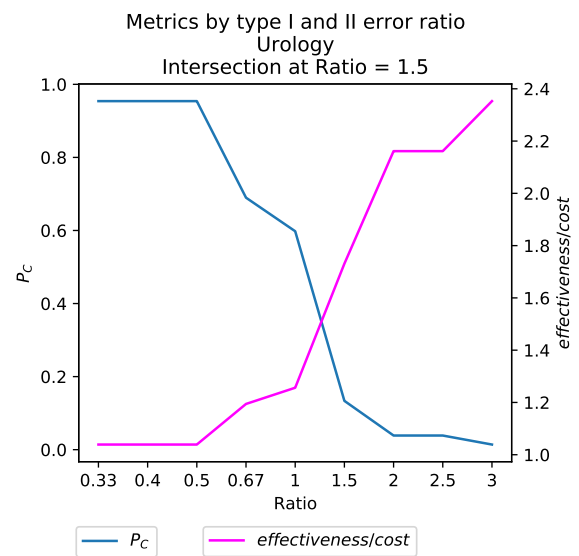

Figure 26: Performance metrics as a function of the type I and II weighting ratio in Urology.
